# Supplementary material
Source: PubMed Central journal article supplement (PMC4136521)
Supplement: NIHMS612584-supplement-01.pdf [file NIHMS612584-supplement-01.pdf]

## Supplementary appendix

This appendix formed part of the original submission and has been peer reviewed. We post it as supplied by the authors.

Supplement to: Stuart BD, Lee JS, Kozlitina J, et al. Effect of telomere length on survival in patients with idiopathic pulmonary fibrosis: an observational cohort study with independent validation. *Lancet Respir Med* 2014; published online June 17. [http://dx.doi.org/10.1016/S2213-2600\(14\)70124-9](http://dx.doi.org/10.1016/S2213-2600(14)70124-9).

**Supplemental Table 1. Coding Telomerase Variants Discovered in Sporadic IPF Patients with Telomere Lengths Below the 10th Percentile of Normal (n=38).**

| <b>Diagnosis</b> | <b>Gene</b> | <b>DNA Change</b>      | <b>Predicted Protein Change</b> |
|------------------|-------------|------------------------|---------------------------------|
| IPF              | <i>TERT</i> | c.2006G>A              | R669Q                           |
| IPF              | <i>TERT</i> | c.2593C>T <sup>1</sup> | R865C                           |
| IPF              | <i>TERT</i> | c.2647T>A              | F883I                           |
| IPF              | <i>TERT</i> | c.2869A>C <sup>1</sup> | S957R                           |

<sup>1</sup>These individuals were previously described in Tsakiri et. al. 2007, PMID:17460043 and Cronkhite et. al. 2008, PMID:18635888.

**Supplemental Table 2. Univariate Survival Analysis of IPF Patients Across All Three Cohorts**

|                                | Dallas IPF cohort  |         | Chicago IPF cohort |         | San Francisco IPF cohort |         |
|--------------------------------|--------------------|---------|--------------------|---------|--------------------------|---------|
|                                | HR (95% CI)        | P-value | HR (95% CI)        | P-value | HR (95% CI)              | P-value |
| Univariate analysis            |                    |         |                    |         |                          |         |
| Age                            | 1 (0.98 - 1.02)    | 0.71    | 0.99 (0.97 - 1.02) | 0.68    | 1.03 (0.99 - 1.07)       | 0.17    |
| Male Sex                       | 1.42 (0.9 - 2.24)  | 0.13    | 1.76 (0.88 - 3.51) | 0.11    | 1.27 (0.49 - 3.31)       | 0.63    |
| FVC, % predicted               | 0.75 (0.66 - 0.84) | <0.0001 | 0.67 (0.55 - 0.81) | <0.0001 | 0.78 (0.61 - 1.01)       | 0.057   |
| DL <sub>CO</sub> , % predicted | 0.67 (0.57 - 0.79) | <0.0001 | 0.61 (0.49 - 0.76) | <0.0001 | 0.79 (0.61 - 1.02)       | 0.071   |
| Telomere Length                | 0.32 (0.14 - 0.72) | 0.0058  | 0.31 (0.11 - 0.84) | 0.021   | 0.38 (0.14 - 1.06)       | 0.065   |
| GAP score                      | 2.76 (1.9 - 4.01)  | <0.0001 | 3.49 (1.89 - 6.42) | <0.0001 | 2.72 (1.29 - 5.74)       | 0.0084  |

The reported hazard ratios are for a 1-year difference in age, a 10% difference in FVC and DL<sub>CO</sub> measurements, and a 1-unit difference in log T/S ratio and GAP score. Data for FVC or DL<sub>CO</sub> (or both) were unavailable for some patients. The univariate analysis included all patients with available data (as shown in Table 1). Patients who were unable to do the DL<sub>CO</sub> test (eight in the Dallas cohort, one in the Chicago cohort, and one in the San Francisco cohort) were included in the analysis using the GAP score. IPF=idiopathic pulmonary fibrosis. HR=hazard ratio. FVC=forced vital capacity. DL<sub>CO</sub>=diffusion capacity for carbon monoxide. GAP=gender-age-physiology.

**Supplemental Table 3. Univariate Analysis of Transplant-free Survival of Non-IPF ILD Patients in the Dallas Cohort.**

| Dallas non-IPF cohort          |                    |         |
|--------------------------------|--------------------|---------|
|                                | HR (95% CI)        | P-value |
| Univariate analysis            |                    |         |
| Age                            | 1.03 (1 - 1.05)    | 0.022   |
| Male Sex                       | 1.81 (1.05 - 3.12) | 0.033   |
| FVC, % predicted               | 0.8 (0.7 - 0.92)   | 0.0015  |
| DL <sub>CO</sub> , % predicted | 0.51 (0.39 - 0.67) | <0.001  |
| Telomere Length                | 0.72 (0.23 - 2.23) | 0.57    |

The reported hazard ratios are for a 1-year difference in age, a 10% difference in FVC and DL<sub>CO</sub> measurements, and a 1-unit difference in log T/S ratio and GAP score. Data for DL<sub>CO</sub> was unavailable for some patients. The univariate analysis included all patients with available data (as shown in Table 1). IPF=idiopathic pulmonary fibrosis. ILD=interstitial lung disease. HR=hazard ratio. FVC=forced vital capacity. DL<sub>CO</sub>=diffusion capacity for carbon monoxide.

**Supplemental Table 4. Sensitivity Analyses for Survival of IPF Patients Across Three Cohorts (with Censoring of Lung Transplantation Events).**

|                                                       | Dallas IPF cohort  |         | Chicago IPF cohort |         | San Francisco IPF cohort |         |
|-------------------------------------------------------|--------------------|---------|--------------------|---------|--------------------------|---------|
|                                                       | HR (95% CI)        | P-value | HR (95% CI)        | P-value | HR (95% CI)              | P-value |
| <b>Univariate analysis</b>                            |                    |         |                    |         |                          |         |
| Age                                                   | 1.02 (1.00 - 1.04) | 0.099   | 1.00 (0.97 - 1.03) | 0.94    | 1.06 (1.01 - 1.11)       | 0.015   |
| Male sex                                              | 1.18 (0.72 - 1.94) | 0.5     | 1.6 (0.8 - 3.21)   | 0.19    | 1.06 (0.4 - 2.83)        | 0.90    |
| FVC, % predicted                                      | 0.79 (0.7 - 0.9)   | <0.0001 | 0.65 (0.53 - 0.8)  | <0.0001 | 0.80 (0.61 - 1.06)       | 0.12    |
| DL <sub>CO</sub> , % predicted                        | 0.63 (0.52 - 0.77) | <0.0001 | 0.65 (0.52 - 0.80) | 0.00010 | 0.79 (0.59 - 1.05)       | 0.10    |
| Telomere Length                                       | 0.34 (0.14 - 0.85) | 0.021   | 0.27 (0.09 - 0.75) | 0.012   | 0.27 (0.09 - 0.82)       | 0.021   |
| GAP score                                             | 3.4 (2.2 - 5.26)   | <0.0001 | 3.58 (1.89 - 6.78) | <0.0001 | 3.61 (1.51 - 8.61)       | 0.0038  |
| <b>Multivariable analysis (individual covariates)</b> |                    |         |                    |         |                          |         |
|                                                       | (n=135)            |         | (n=123)            |         | (n=49)                   |         |
| Age                                                   | 1.03 (1.00 - 1.07) | 0.040   | 1.00 (0.97 - 1.04) | 0.90    | 1.06 (1.00 - 1.12)       | 0.034   |
| Male sex                                              | 1.23 (0.7 - 2.13)  | 0.47    | 1.92 (0.75 - 4.88) | 0.17    | 1.02 (0.28 - 3.80)       | 0.97    |
| FVC, % predicted                                      | 0.89 (0.72 - 1.09) | 0.24    | 0.81 (0.62 - 1.06) | 0.13    | 0.90 (0.66 - 1.24)       | 0.53    |
| DL <sub>CO</sub> , % predicted                        | 0.63 (0.49 - 0.8)  | 0.00017 | 0.66 (0.51 - 0.86) | 0.0022  | 0.73 (0.52 - 1.01)       | 0.061   |
| Telomere Length                                       | 0.35 (0.11 - 1.15) | 0.085   | 0.11 (0.03 - 0.41) | 0.0011  | 0.13 (0.03 - 0.52)       | 0.0040  |
| <b>Multivariable analysis (GAP score)</b>             |                    |         |                    |         |                          |         |
|                                                       | (n=143)            |         | (n=124)            |         | (n=50)                   |         |
| GAP score                                             | 3.27 (2.1 - 5.1)   | <0.0001 | 3.8 (1.94 - 7.42)  | <0.0001 | 3.81 (1.62 - 8.97)       | 0.0022  |
| Telomere length                                       | 0.6 (0.21 - 1.76)  | 0.35    | 0.2 (0.05 - 0.74)  | 0.016   | 0.14 (0.03 - 0.53)       | 0.0041  |

The reported hazard ratios are per a 1-year difference in age, a 10% difference in FVC and DL<sub>CO</sub> measurements, and a 1-unit difference in log T/S ratio and GAP score. Data for FVC or DL<sub>CO</sub> (or both) were unavailable for some patients. The univariate analysis included all patients with available data (as shown in Table 1). Patients who were unable to do the DL<sub>CO</sub> test (eight in the Dallas cohort, one in the Chicago cohort, and one in the San Francisco cohort) were excluded from the multivariable analysis when using individual covariates, but included when using the GAP score. IPF=idiopathic pulmonary fibrosis. HR=hazard ratio. FVC=forced vital capacity. DL<sub>CO</sub>=diffusion capacity for carbon monoxide. GAP=gender-age-physiology.
